# Supplementary figures and images for: On the Origin of Compositional Features of Ribosomes
Source: PubMed Central journal article supplement — Genome Biol Evol. 2018 Jul 30;10(8):2010–6. doi: 10.1093/gbe/evy169 (PMC6097593; doi:10.1093/gbe/evy169), 2018-07-30

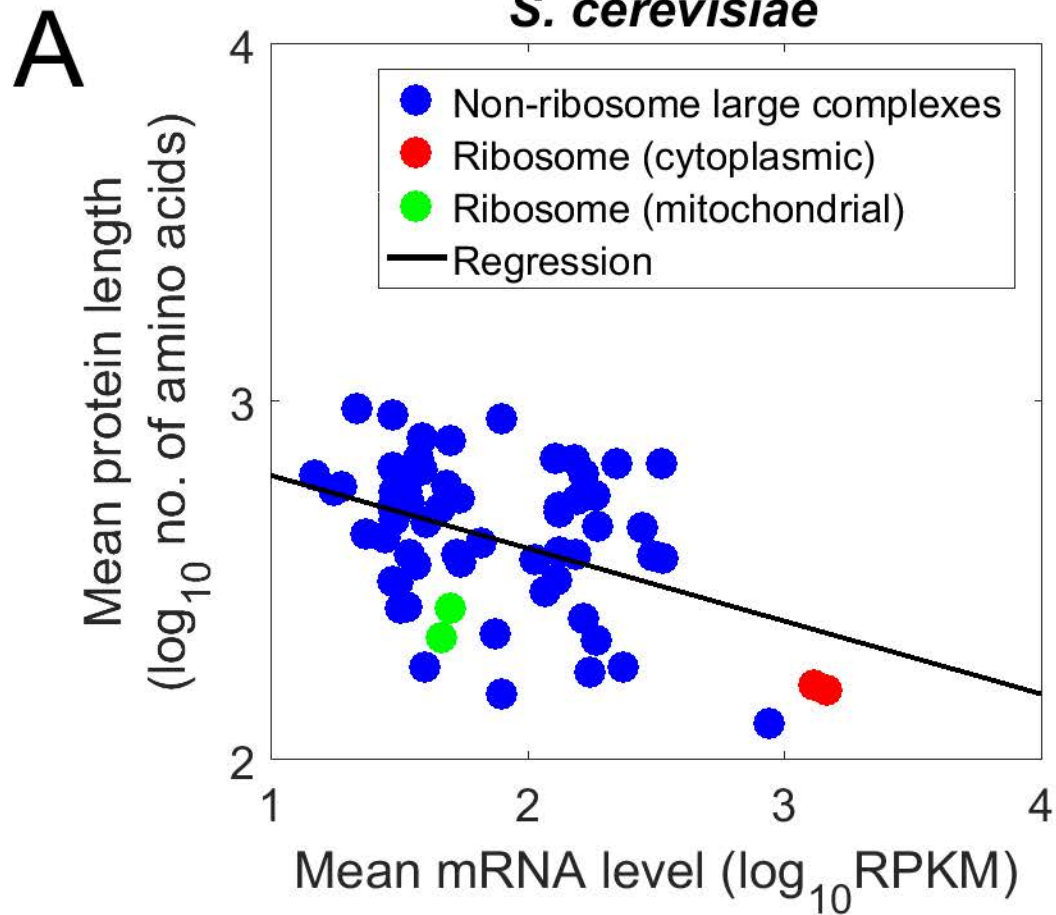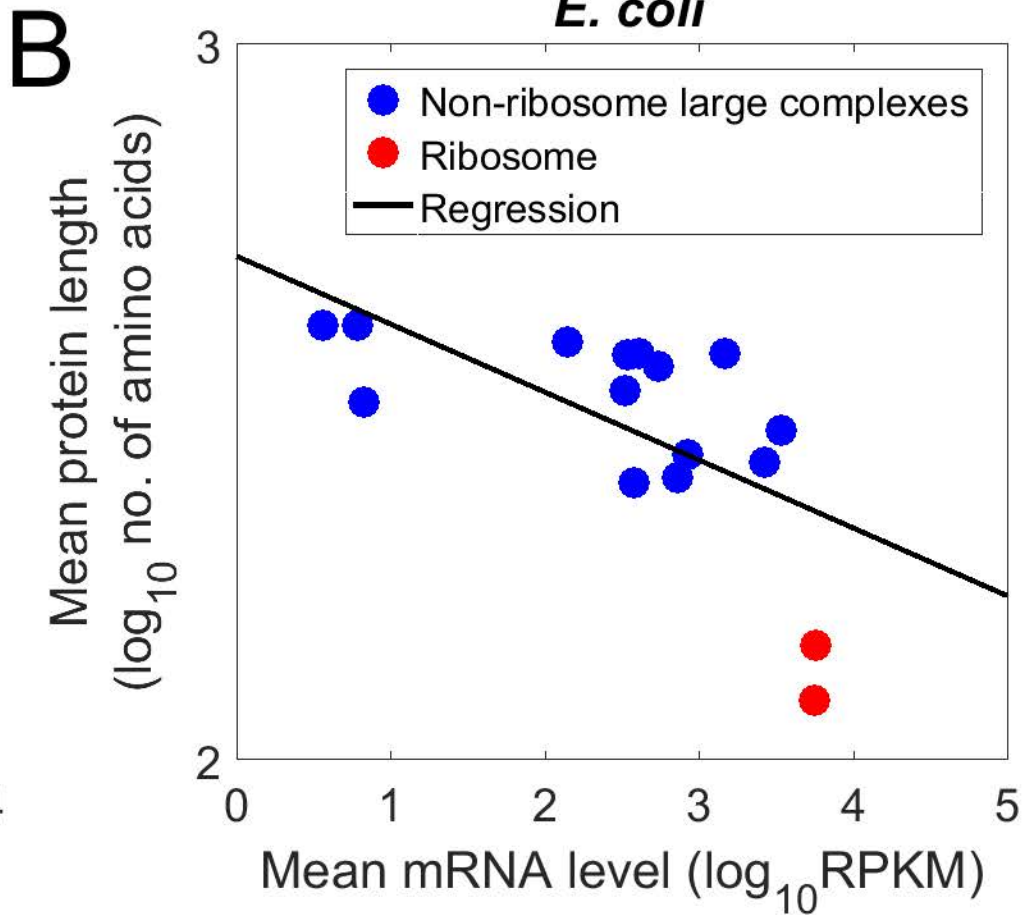

Supplement: evy169_figs1.pdf [file evy169_figs1.pdf]
